# Supplementary material for: Poor Long-Term Renal Allograft Survival in Patients with Chronic Antibody-Mediated Rejection, Irrespective of Treatment—A Single Center Retrospective Study
Source: MDPI journal article supplement (doi:10.3390/jcm11010199), 2021-12-30
Supplement: s1 [file s1]

## Supplementary

**Table S1.** univariate Kaplan-Meier analysis of severity of Banff lesion score on 5-year death-censored graft survival after diagnosis of cAMR.

| Score of Banff lesions  | death-censored<br>graft survival | Log rank, p-value |
|-------------------------|----------------------------------|-------------------|
| g0 ( <i>n</i> = 44)     | 31.80%                           | 0.74              |
| g1( <i>n</i> = 11)      | 36.40%                           |                   |
| cg1 ( <i>n</i> = 14)    | 35.70%                           |                   |
| cg2-3 ( <i>n</i> = 41)  | 31.70%                           | 0.92              |
| mm0-1 ( <i>n</i> = 48)  | 35.40%                           |                   |
| mm2-3 ( <i>n</i> =7)    | 14.30%                           |                   |
| v0-1 ( <i>n</i> = 51)   | 33.30%                           | 0.15              |
| v2-3 ( <i>n</i> = 4)    | 25.00%                           |                   |
| ah0-1 ( <i>n</i> = 8)   | 37.50%                           |                   |
| ah2-3 ( <i>n</i> = 47)  | 31.90%                           | 0.93              |
| cv0-1 ( <i>n</i> = 23)  | 43.50%                           |                   |
| cv2-3 ( <i>n</i> = 32)  | 25.00%                           |                   |
| ai0-1 ( <i>n</i> = 41)  | 34.10%                           | 0.41              |
| ai2-3 ( <i>n</i> = 14)  | 28.60%                           |                   |
| at0-1 ( <i>n</i> = 51)  | 33.30%                           |                   |
| at2-3 ( <i>n</i> = 4)   | 25.00%                           | 0.36              |
| ci0-1 ( <i>n</i> = 46)  | 34.80%                           |                   |
| ci2-3 ( <i>n</i> = 9)   | 22.20%                           |                   |
| ct0-1 ( <i>n</i> = 45)  | 33.30%                           | 0.89              |
| ct2-3 ( <i>n</i> = 10)  | 30.00%                           |                   |
| ptc0-1 ( <i>n</i> =51)  | 35.30%                           |                   |
| ptc 2-3 ( <i>n</i> = 4) | 0.00%                            | 0.05              |
